# Supplementary material
Source: MDPI journal article supplement (https://www.mdpi.com/2073-4441/15/6/1198)
Supplement: s1 [file s1]

# Supplementary Material Table S1: List of the 140 aquaponic structures.

| <i>Name</i>             | <i>Country</i> | <i>Address</i>                                    | <i>Website</i>                                                                                                      |
|-------------------------|----------------|---------------------------------------------------|---------------------------------------------------------------------------------------------------------------------|
| Bluen                   | Austria        | Schafflerhofstraße<br>156,<br><br>1220 Wien       | <a href="https://bluen.at">https://bluen.at</a>                                                                     |
| AgroBio Tech Uliege     | Belgium        | Passage des<br>Déportés2 B, 5030<br>Gembloux      | <a href="https://www.gembloux.ulg.ac.be/agriculture-urbaine">https://www.gembloux.ulg.ac.be/agriculture-urbaine</a> |
| Aqua4c - tomato masters | Belgium        | Stokstormestraat 4,<br><br>9770 Kruisem           | <a href="https://www.omegabaars.be">https://www.omegabaars.be</a>                                                   |
| AquaLota                | Belgium        | Ernest-Claesstraat<br>8,<br><br>9240 Zele         | <a href="https://aqualota.be">https://aqualota.be</a>                                                               |
| Aquaponie bxl           | Belgium        | Boulevard Industriel<br>16 bis, 1070<br>Bruxelles | <a href="https://aquaponiebxl.be">https://aquaponiebxl.be</a>                                                       |
| Aquaponiris             | Belgium        | Rue Fernand<br>Bernier, 1060<br>Bruxelles         | <a href="https://aquaponiris.be">https://aquaponiris.be</a>                                                         |
| Aterlier Boissimé       | Belgium        | Rue Bossimé 2B,<br>5101 Namur                     | <a href="https://www.atelierdebossime.be">https://www.atelierdebossime.be</a>                                       |
| BIGH                    | Belgium        | Rue Ropsy<br>Chaudron, 1070<br>Anderlecht         | <a href="https://bigh.farm">https://bigh.farm</a>                                                                   |

|                             |                |                                                              |                                                                               |
|-----------------------------|----------------|--------------------------------------------------------------|-------------------------------------------------------------------------------|
| Donbosco                    | Belgium        | Av. du Val d'Or 90,<br>1150 Woluwe-Saint-<br>Pierre          | <a href="https://www.idbbxl.com">https://www.idbbxl.com</a>                   |
| Inagro                      | Belgium        | Ieperseweg 87<br>8800 Rumbeke-<br>Beitem                     | <a href="https://leden.inagro.be">https://leden.inagro.be</a>                 |
| PCG                         | Belgium        | Karreweg 6, 9770<br>Kruishoutem                              | <a href="https://www.pcgroenteteelt.be">https://www.pcgroenteteelt.be</a>     |
| PTI                         | Belgium        | Graaf Karel de<br>Goedelaan 7, 8500<br>Kortrijk              | <a href="https://www.ik-word-pti.be">https://www.ik-word-pti.be</a>           |
| Smart Farmers               | Belgium        | Drongensesteenweg<br>254, 9000 Gent                          | <a href="https://smartfarmers.eu">https://smartfarmers.eu</a>                 |
| Symbiose                    | Belgium        | Croix du Sud 5,<br>1348 Louvain-la-<br>Neuve                 | <a href="https://symbiose.bio">https://symbiose.bio</a>                       |
| Tomato Master               | Belgium        | Stokstormestraat 14<br>A, 9800 Deinze                        | <a href="https://www.tomatomasters.be">https://www.tomatomasters.be</a>       |
| Smartfarmers                | Belgium        | Drongensesteenweg<br>254, B-9000 Ghent                       | <a href="https://smartfarmers.eu">https://smartfarmers.eu</a>                 |
| University of Banja Luka    | Bosnia         | Bulevar vojvode<br>Petra Bojovica 1A,<br>78000 Banja Luka    | <a href="http://agro.unibl.org">http://agro.unibl.org</a>                     |
| Herbanleaf                  | Cyprus         | Antonis Andronikou<br>Street Parekklesia<br>CY, 4520, Cyprus | <a href="https://www.herbanleaffarms.com">https://www.herbanleaffarms.com</a> |
| Aquaponics Farm Association | Czech Republic | Záhumní 113/61<br>,Ostrava - Poruba<br>708 00                | <a href="https://www.aaqp.eu">https://www.aaqp.eu</a>                         |
| Farma Pro Vsechny           | Czech Republic | Rybná 716/24,<br><br>110 00 Praha 1                          | <a href="https://farmaprovsechny.cz">https://farmaprovsechny.cz</a>           |
| Akvaponisk Have             | Danemark       | Bøgelundvej 2,                                               | <a href="http://akvaponiskhave.dk">http://akvaponiskhave.dk</a>               |

|                      |         |                                                                                |                                                                                                                                         |
|----------------------|---------|--------------------------------------------------------------------------------|-----------------------------------------------------------------------------------------------------------------------------------------|
|                      |         | 7620 Lemvig,                                                                   |                                                                                                                                         |
| IGFF                 | Denmark | Rymarksvej 89,<br>2900 Hellerup,<br>Danemark                                   | <a href="http://www.igff.dk">www.igff.dk</a>                                                                                            |
| Jyväskylä University | Finland | Seminaarinkatu 15,<br>40014 Jyväskylän<br>yliopisto, Finland                   | <a href="https://www.jyu.fi">https://www.jyu.fi</a>                                                                                     |
| ACRA                 | France  | Acra sarl, Lieu-dit-<br>Gouts. 47190<br>Aiguillon                              | <a href="http://acra-gouts.fr">http://acra-gouts.fr</a>                                                                                 |
| Agriloops            | France  | 65 Rue de Saint-<br>Brieuc, Rennes,<br>Bretagne, 35000,<br>France              | <a href="https://www.agriloops.com">https://www.agriloops.com</a>                                                                       |
| Agrosymbiose         | France  | Assas, Montpellier,<br>France                                                  | <a href="http://www.agrosymbiose.com">http://www.agrosymbiose.com</a>                                                                   |
| AquaBio Farm         | France  | ?                                                                              | <a href="https://www.aquabiofarm.fr">https://www.aquabiofarm.fr</a>                                                                     |
| Aquaponie France     | France  | 8 Rue de la<br>République, 51140<br>Romain                                     | <a href="http://www.aquaponiefrance.com">www.aquaponiefrance.com</a>                                                                    |
| Aquaprimieur         | France  | Rte de Moret,<br>77690 La<br>Genevraye, France                                 | <a href="http://www.aquaprimieur.fr">http://www.aquaprimieur.fr</a>                                                                     |
| ASTREDHOR, RATHO     | France  | Les Hoteaux, 135<br>chemin Finday,<br>69126 BRINDAS                            | <a href="https://www.astredhor.fr">https://www.astredhor.fr</a>                                                                         |
| Au Terroire          | France  | 44 rue Jean Jaures,<br>45200 Montargis                                         | <a href="https://www.ohterroir-montargis.com">https://www.ohterroir-montargis.com</a>                                                   |
| Carpe et Capucine    | France  | 202, avenue de la<br>République<br>Loriol-Sur-Drôme,<br>Rhône-Alpes,<br>France | <a href="https://carpe-et-capucine-o-jardin-aquaponique.business.site">https://carpe-et-capucine-o-jardin-aquaponique.business.site</a> |

|                                   |        |                                                                                                 |                                                                                                                           |
|-----------------------------------|--------|-------------------------------------------------------------------------------------------------|---------------------------------------------------------------------------------------------------------------------------|
| Cuillette urbaine - Culina Hortus | France | 20-22 villa<br>Deshayes, Paris,<br>75014                                                        | <a href="https://www.cueilletteurbaine.com">https://www.cueilletteurbaine.com</a>                                         |
| De l'Eau a la bouche              | France | Rue Joseph Wauters<br>1, 4480 Engis                                                             | <a href="https://leauàlabouche.be">https://leauàlabouche.be</a>                                                           |
| Eauzons                           | France | 32170 Aux-Aussat                                                                                | <a href="https://eauzons.fr">https://eauzons.fr</a>                                                                       |
| Echo Village                      | France | chemin de Neuville,<br>Santes                                                                   | <a href="https://echo-village.com">https://echo-village.com</a>                                                           |
| Echologia                         | France | 3. Bas Barbé,<br>Hameau<br>Chaufournier,<br>53950 Louverné.                                     | <a href="https://www.echologia.com">https://www.echologia.com</a>                                                         |
| EcoGrow                           | France | Route de la Sorge 2,<br>1030 Bussigny                                                           | <a href="https://ecogrow.ch">https://ecogrow.ch</a>                                                                       |
| EPL de Bréhoulou                  | France | 3 Chemin de<br>Kernoac'h,<br>29170 Fouesnant                                                    | <a href="https://www.brehoulou.eu">https://www.brehoulou.eu</a>                                                           |
| EPLEFPA, Lycée de la Canourgue    | France | CIVERGOLS 48200<br>SAINT CHÉLY<br>D'APCHER, Chemin<br>Fraissinet, 48500 La<br>Canourgue, France | <a href="https://www.epl-lozere.fr/legtpa-site-de-la-canourgue">https://www.epl-lozere.fr/legtpa-site-de-la-canourgue</a> |
| Ferme Aquacole D'anjou            | France | Route de Notre-<br>Dame du Pé, 49640<br>Morannes sur<br>Sarthe                                  | <a href="https://www.ferme-aquacole.com">https://www.ferme-aquacole.com</a>                                               |
| Ferme Aquaponique de l'Abbaye     | France | 60 Les Champs de la<br>Corvée, 88390<br>Chaumousey                                              | <a href="https://lavenirestdanslassiette.fr">https://lavenirestdanslassiette.fr</a>                                       |
| Ferme Aquaponique de l'Abbaye     | France | 20 rue Guillaume le<br>Conquérant, 76890<br>Saint Victor<br>l'Abbaye                            | <a href="http://aquaponienormandie.com">http://aquaponienormandie.com</a>                                                 |

|                                  |        |                                                                          |                                                                                                                                                                                                           |
|----------------------------------|--------|--------------------------------------------------------------------------|-----------------------------------------------------------------------------------------------------------------------------------------------------------------------------------------------------------|
| Ferme Aquaponique du Cotentin    | France | Avenue de la<br>Banque à Genêts<br>Cherbourg, France                     | <a href="http://www.fermeaquaponiquecotentin.fr">http://www.fermeaquaponiquecotentin.fr</a>                                                                                                               |
| Ferme aquaponique du pays de Gex | France | 120 rue du Stade<br>accès, Rte de Collex<br>Bossy, 01210<br>Versonnex    | <a href="https://www.lafermeaquaponique.com">https://www.lafermeaquaponique.com</a>                                                                                                                       |
| Fives-Cail                       | France | 18 Cours Jean-<br>François Cail, 59800<br>Lille                          | <a href="https://fivescail-lille-hellemmes.fr">https://fivescail-lille-hellemmes.fr</a>                                                                                                                   |
| Green'elle                       | France | 125 bis rue de<br>l'abbé groult, 75015<br>Paris                          | <a href="http://www.greenelle.fr">www.greenelle.fr</a>                                                                                                                                                    |
| HydrOccitanie                    | France | Lieu-dit Bugnac<br>31570 TARABEL                                         | <a href="https://www.hydroccitanie.com">https://www.hydroccitanie.com</a>                                                                                                                                 |
| Isa Lille                        | France | 2 Rue Norbert<br>Segard, 59800 Lille,<br>France                          | <a href="https://www.isa-lille.fr">https://www.isa-lille.fr</a>                                                                                                                                           |
| La ferme de demain               | France | Chemin des<br>Cerisiers, 34600<br>Hérépian                               | <a href="http://lafermede2main.fr">http://lafermede2main.fr</a>                                                                                                                                           |
| La ferme du poisson vert         | France | Chemin des<br>Platriers<br>Jonquières,<br>Provence-Alpes-<br>Cote D'Azur | <a href="https://www.facebook.com/pg/La-Ferme-du-poisson-vert-104291657917509/about/?ref=page_internal">https://www.facebook.com/pg/La-Ferme-du-poisson-vert-104291657917509/about/?ref=page_internal</a> |
| La Ferme du terr'eau             | France | Le puy tabardeau,<br>23300 NOTH                                          | <a href="http://www.lafermeduterreau.fr">http://www.lafermeduterreau.fr</a>                                                                                                                               |
| La Ferme Integrale               | France | 222 rue des bleuets,<br>26730 La Baume-<br>d'Hostun                      | <a href="http://ferme-integrale.org">http://ferme-integrale.org</a>                                                                                                                                       |
| La Pommeraie Aquaculture         | France | La Pommeraie,<br>72230 Monce-en-<br>Belin                                | <a href="https://www.instagram.com/lapommeraieaquaculture">https://www.instagram.com/lapommeraieaquaculture</a>                                                                                           |

|                                         |        |                                                                     |                                                                                                                                                                   |
|-----------------------------------------|--------|---------------------------------------------------------------------|-------------------------------------------------------------------------------------------------------------------------------------------------------------------|
| La recyclerie                           | France | 83, boulevard Ornano, 75018 Paris                                   | <a href="http://www.larecyclerie.com">http://www.larecyclerie.com</a>                                                                                             |
| L'autre campagne                        | France | 2399 Route de Lannes, 40390 Saint-Martin-de-Seignanx                | <a href="https://www.lautrecampagne.com">https://www.lautrecampagne.com</a>                                                                                       |
| Le petit Caillou                        | France | Chem. des Écorces, 45230 Châtillon-Coligny                          | <a href="https://www.lepanierdupetitcaillou.com">https://www.lepanierdupetitcaillou.com</a>                                                                       |
| Le poisson maraicher                    | France | 4 rue de la République, 31120 Pinsaguel                             | <a href="https://www.lepoissonmaraicher.fr">https://www.lepoissonmaraicher.fr</a>                                                                                 |
| Le potager des Poissons                 | France | 171 route des grands fossés Les Gouttes, 16110 Moulins-sur-Tardoire | <a href="https://www.facebook.com/pg/lepotagerdespoissons/about/?ref=page_internal">https://www.facebook.com/pg/lepotagerdespoissons/about/?ref=page_internal</a> |
| Le potager flottant                     | France | 220 Av Maquis Montagne Noire, 11400 Castelnaudary                   | <a href="https://www.facebook.com/LePotagerFlottant">https://www.facebook.com/LePotagerFlottant</a>                                                               |
| Les Pieds dans L'eau                    | France | 19 Rue de la Paix, 49280 La Séguinière                              | <a href="https://www.lespiedsdansleau49.fr">https://www.lespiedsdansleau49.fr</a>                                                                                 |
| l'île aux Légumes                       | France | 1789 chemin de ceinture, 82000 Montauban                            | <a href="https://www.ileauxlegumes.fr">https://www.ileauxlegumes.fr</a>                                                                                           |
| Lycée horticole de Ribécourt            | France | 91 Rue André Régnier, 60170 Ribécourt-Dreslincourt                  | <a href="https://horticole-ribecourt-dreslincourt.ac-amiens.fr">https://horticole-ribecourt-dreslincourt.ac-amiens.fr</a>                                         |
| Lycee Proffesionel Maritime et Aquacole | France | 0072 location29, allée de la barbotière - 33470 GUJAN-MESTRAS -     | <a href="https://www.lyceedelamergujan.fr">https://www.lyceedelamergujan.fr</a>                                                                                   |

|                                                   |        |                                                                                  |                                                                                           |
|---------------------------------------------------|--------|----------------------------------------------------------------------------------|-------------------------------------------------------------------------------------------|
| Lycee Proffesionelle Olivier Guichard             | France | 12 Rue De La Fauvette 44350 Guerande                                             | <a href="https://www.lycee-olivier-guichard.fr">https://www.lycee-olivier-guichard.fr</a> |
| Lycee Saint Christophe                            | France | 164 Rte de Bayonne, 64310 Saint-Pée-sur-Nivelle                                  | <a href="http://www.lyceesaintchristophe.com">http://www.lyceesaintchristophe.com</a>     |
| Nagualma                                          | France | Chemin de la plaine de Laval, 6400 Cannes                                        | <a href="http://nagualma.com">http://nagualma.com</a>                                     |
| Nutreets                                          | France | Le Norestier, 44450 La Chapelle-Basse-Mer                                        | <a href="https://nutreets.fr">https://nutreets.fr</a>                                     |
| Oasis Citadine                                    | France | 87-69 Rue de la Mogère, 34000 Montpellier                                        | <a href="https://oasiscitadine.fr">https://oasiscitadine.fr</a>                           |
| Pauline Air Fram                                  | France | 3, Rue Banlin, 33310 Lormont                                                     | <a href="https://www.paulineairfarm.com">https://www.paulineairfarm.com</a>               |
| Pisciculture Expérimentale INRA des Monts d'Arrée | France | ITAVI Service technique Aquaculture; 28 rampe Bouvreuil, 76000, Rouen            | <a href="https://projetapiva.wordpress.com">https://projetapiva.wordpress.com</a>         |
| potager des princes                               | France | 17 rue de la faisanderie Chantilly                                               | <a href="https://www.potagerdesprinces.com">https://www.potagerdesprinces.com</a>         |
| Saumon de France                                  | France | du fort des Flamands, ZA Produimer, Chem. de la Cale, 50110 CHERBOURG EN COTENTI | <a href="https://www.saumonfrance.fr">https://www.saumonfrance.fr</a>                     |
| Smidap                                            | France | 3 Rue Célestin Freinet, 44200 Nantes                                             | <a href="https://www.smidap.fr">https://www.smidap.fr</a>                                 |

|                                                              |         |                                                                                |                                                                                                                                                       |
|--------------------------------------------------------------|---------|--------------------------------------------------------------------------------|-------------------------------------------------------------------------------------------------------------------------------------------------------|
| Sous les Fraises - Ferme Aquaponique Aubervilliers           | France  | 202 avenue des<br>Magasins Généraux,<br>93300 Aubervilliers                    | <a href="https://www.souslesfraises.com/farmhouse-aubervilliers">https://www.souslesfraises.com/farmhouse-aubervilliers</a>                           |
| Urban Leaf                                                   | France  | agrosup Dijon - 26<br>boulevard du<br>docteur petitjean                        | <a href="http://www.urban-leaf.com">www.urban-leaf.com</a>                                                                                            |
| Végéto                                                       | France  | 17 rue de<br>l'hermitage, 02200<br>Autrêches                                   | <a href="https://www.vegeto-aquaponie.fr">https://www.vegeto-aquaponie.fr</a>                                                                         |
| DesertFoods                                                  | Germany | Beseliner Parkweg<br>5, 18196<br>Dummerstorf                                   | <a href="https://www.desertfoods-international.com">https://www.desertfoods-international.com</a>                                                     |
| Die Urbanisten                                               | Germany | die Urbanisten e.V.,<br>Rheinische Straße<br>137, 44147<br>Dortmund            | <a href="https://dieurbanisten.de">https://dieurbanisten.de</a>                                                                                       |
| ECF                                                          | Germany | Bessemersstraße 20,<br>12103 Berlin,<br>Germany                                | <a href="http://www.ecf-farmsystems.com">http://www.ecf-farmsystems.com</a>                                                                           |
| Fisch&Grun                                                   | Germany | Wunstorferstraße<br>191, Neustadt am<br>Rübenberge                             | <a href="https://foodroots.earth/fisch_gruen-brunnenkressekultur-poggenhagen">https://foodroots.earth/fisch_gruen-brunnenkressekultur-poggenhagen</a> |
| Fischerei Müritz-Plau GmbH                                   | Germany | Eldenholz 42<br>17192 Waren<br>(Müritz)                                        | <a href="https://www.mueritzfischer.de">https://www.mueritzfischer.de</a>                                                                             |
| Leibniz Institute of freshwater Ecology and inland fisheries | Germany | Müggelseedamm<br>310, 12587 Berlin                                             | <a href="https://www.igb-berlin.de">https://www.igb-berlin.de</a>                                                                                     |
| nexusfarms                                                   | Germany | Trevor Weiss &<br>Cristian Wedgwood<br>132 Mulheimer<br>Freiheit<br>51063 Köln | <a href="https://www.nexusfarms.de">https://www.nexusfarms.de</a>                                                                                     |
| Platzprojekt                                                 | Germany | Fössestraße 103,<br>30453 Hannover                                             | <a href="https://platzprojekt.de">https://platzprojekt.de</a>                                                                                         |



|                                                |         |                                                                                                                                        |                                                                             |
|------------------------------------------------|---------|----------------------------------------------------------------------------------------------------------------------------------------|-----------------------------------------------------------------------------|
| South Wesphalia University of Applied Sciences | Germany | Frauenstuhlweg 31,<br>58644 Iserlohn                                                                                                   | <a href="https://www.fh-swf.de">https://www.fh-swf.de</a>                   |
| Universität Rostock                            | Germany | University of<br>Rostock<br>Faculty of<br>Agriculture and<br>Environmental<br>Sciences<br>Justus-von-Liebig-<br>Weg 6<br>18059 Rostock | <a href="https://www.auf.uni-rostock.de">https://www.auf.uni-rostock.de</a> |
| Université de Humboldt                         | Germany | Albrecht-Thaer-Weg<br>1, 14195 Berlin,<br>Room 103                                                                                     | <a href="https://www.agrar.hu-berlin.de">https://www.agrar.hu-berlin.de</a> |
| Aquapon                                        | Greece  | Paianon 34, Ano<br>Kipseli, Athens 113<br>63                                                                                           | <a href="http://aquapon.gr">http://aquapon.gr</a>                           |
| University of Thessaly                         | Greece  | Αργοναυτών,<br>Filellinon και, Volos<br>382 21                                                                                         | <a href="https://www.uth.gr">https://www.uth.gr</a>                         |
| Hungary Academie of Science                    | Hungary | Budapest, Széchenyi<br>István tér 9                                                                                                    | <a href="https://mta.hu">https://mta.hu</a>                                 |
| Kaposvari Egyetem                              | Hungary | Kaposvár, Guba<br>Sándor u. 40, 7400<br>Hungary                                                                                        | <a href="http://www.ke.hu">www.ke.hu</a>                                    |
| Samraekt Laugarmyri                            | Iceland | Grandagarði 16, 101<br>Reykjavík                                                                                                       | <a href="http://www.samraekt.is">www.samraekt.is</a>                        |
| University of Iceland/Svinna                   | Iceland | Fannafold 61 - 112<br>Reykjavík, pilot in<br>Akur. Laugaras,<br>Iceland                                                                | <a href="https://svinna.is">https://svinna.is</a>                           |
| Belvedere College SJ                           | Ireland | 6 Denmark Street<br>Great, Rotunda,<br>Dublin                                                                                          | <a href="https://belvederecollege.ie">ttps://belvederecollege.ie</a>        |

|                            |             |                                                                     |                                                                                                                                                       |
|----------------------------|-------------|---------------------------------------------------------------------|-------------------------------------------------------------------------------------------------------------------------------------------------------|
| Aquaponica OFS Piemont     | Italy       | Località Vignole,<br>Sommariva Perno                                | <a href="https://www.facebook.com/pg/acquaponicaofs/about/?ref=page_internal">https://www.facebook.com/pg/acquaponicaofs/about/?ref=page_internal</a> |
| Eurika Farming             | Italy       | ?                                                                   | <a href="http://www.eurekafarming.com">http://www.eurekafarming.com</a>                                                                               |
| Irciponics                 | Italy       | S.P. 258<br>Marecchiese, 60 -<br>47865 Pietracuta di<br>S. Leo (RN) | <a href="https://www.irciponic.com">https://www.irciponic.com</a>                                                                                     |
| My Rivendell Aquaponics    | Italy       | località cannatelli,<br>snc Porto Santo<br>Stefano, Toscana         | <a href="https://my-rivendell.business.site">https://my-rivendell.business.site</a>                                                                   |
| Rubisco                    | Italy       | ?                                                                   | <a href="https://www.rubiscoitalia.it">https://www.rubiscoitalia.it</a>                                                                               |
| The Circle                 | Italy       | Via del Casale<br>Ciminelli 20a,<br>00132, Roma                     | <a href="http://www.thecircle.global">http://www.thecircle.global</a>                                                                                 |
| University of Padova       | Italy       | Agripolis - Viale<br>dell'università, 16 -<br>Legnaro               | <a href="https://www.tesaf.unipd.it">https://www.tesaf.unipd.it</a>                                                                                   |
| Blue Acres, duurzamekost   | Netherlands | 96-02 Torenallee ,<br>5th floor of 't Veem,<br>Eindhoven            | <a href="http://www.blueacres.nl">http://www.blueacres.nl</a>                                                                                         |
| Mediamatic                 | Netherlands | 6 Dijkgracht, 1019<br>BS Amsterdam                                  | <a href="https://www.mediamatic.net">https://www.mediamatic.net</a>                                                                                   |
| Uit Je Eigen Stad          | Netherlands | Marconistraat 39,<br>3029 AG Rotterdam                              | <a href="https://www.debuik.nl/rotterdam/restaurant/uit-je-eigen-stad">https://www.debuik.nl/rotterdam/restaurant/uit-je-eigen-stad</a>               |
| Urban Farmers              | Netherlands | Televisiestraat 2U,<br>2525 KD Den Haag                             | <a href="https://www.urbanfarmers.nl">https://www.urbanfarmers.nl</a>                                                                                 |
| Westerpark Hotel Amsterdam | Netherlands | Haarlemmerweg 10,<br>1014 BE Amsterdam                              | <a href="https://www.conscioushotels.com">https://www.conscioushotels.com</a>                                                                         |
| NIBIO                      | Norway      | Landvik<br>Reddalsveien 215,<br>4886 Grimstad                       | <a href="https://www.nibio.no">https://www.nibio.no</a>                                                                                               |

|                                                |          |                                                                                                                                                |                                                                   |
|------------------------------------------------|----------|------------------------------------------------------------------------------------------------------------------------------------------------|-------------------------------------------------------------------|
| Aberta Nova                                    | Portugal | RUA DA<br>MADALENA, 139 2º<br>1100-319, LISBOA<br>Portugal                                                                                     | <a href="http://www.abertanova.pt">http://www.abertanova.pt</a>   |
| Centro de Educação Ambiente                    | Portugal | Parque Verde da<br>Várzea, 2560-000<br>Torres Vedras,                                                                                          | <a href="http://www.cm-tvedras.pt">http://www.cm-tvedras.pt</a>   |
| Vodena Basta                                   | Serbia   | Svetosavska 17a,<br>Stapar , Republika<br>Srbija                                                                                               | <a href="http://vodenabasta.rs">http://vodenabasta.rs</a>         |
| Biotechnical center Naklo                      | Slovenia | Biotehniski center<br>Naklo, Strahinj 99,<br>4202 Naklo,<br>Slovenie                                                                           | <a href="http://www.bc-naklo.si">www.bc-naklo.si</a>              |
| Hausnatura                                     | Slovenia | Ružinovská 42,<br>82103 Bratislava 17<br>Slovakia                                                                                              | <a href="http://www.hausnatura.com">http://www.hausnatura.com</a> |
| Ponika-Ponnod                                  | Slovenia | Ponika - ponnod,<br>Research &<br>Development Ltd.<br>Ptujška ulica 19,<br>1000 Ljubljana,<br>Slovenia, pilot in<br>landscape park<br>Goricko. | <a href="http://www.ponnod.com">http://www.ponnod.com</a>         |
| University of Ljubljana, Biotehniška Fakulteta | Slovenia | Jamnikarjeva ulica<br>101, 1000 Ljubljana                                                                                                      | <a href="https://www.bf.uni-lj.si">https://www.bf.uni-lj.si</a>   |
| Aquapioneers                                   | Spain    | Ctra. BV-1415<br>(Horta-Cerdanyola),<br>km 7, Masia Can<br>Valldaura, Valldaura<br>Labs, 08290<br>Barcelona                                    | <a href="http://aquapioneers.io">http://aquapioneers.io</a>       |

|                          |             |                                                                                   |                                                                                                                 |
|--------------------------|-------------|-----------------------------------------------------------------------------------|-----------------------------------------------------------------------------------------------------------------|
| Aquaponics Iberia        | Spain       | Ecocampus Pólo 2<br>Rua da Estr. Militar,<br>2565-782 Turcifal –<br>Torres Vedras | <a href="https://www.aquaponicsiberia.com">https://www.aquaponicsiberia.com</a>                                 |
| Ideaqua Fish & Aquaponic | Spain       | Lugar Vecindario,<br>15, 35110 Santa<br>Lucía de Tirajana,<br>Las Palmas, Espagne | <a href="https://www.facebook.com/Ideaquafishandaquaponic">https://www.facebook.com/Ideaquafishandaquaponic</a> |
| NER-Breen                | Spain       | Zimizarga Auzoa,<br>49, 20280<br>Hondarribia,<br>Gipuzkoa                         | <a href="https://breen.es">https://breen.es</a>                                                                 |
| Tilamur                  | Spain       | TILAMUR La Noria<br>37, 30564 Lorquí<br>Murcia                                    | <a href="http://tilamur.com">http://tilamur.com</a>                                                             |
| Verdes Del Sur           | Spain       | 15; planta 2, puerta<br>A, 41013-Sevilla                                          | <a href="https://huertosverdesdelsur.blogspot.com">https://huertosverdesdelsur.blogspot.com</a>                 |
| hemmaodlat               | Sweden      | August Castle<br>Square, 21447 ,<br>Malmö                                         | <a href="https://www.hemmaodlat.se">https://www.hemmaodlat.se</a>                                               |
| Johannas Stadsodlingar   | Sweden      | Brunnsbacken 7,<br>192 69 Sollentuna                                              | <a href="http://www.johannas.org">http://www.johannas.org</a>                                                   |
| Peckas Tomatos           | Sweden      | Verkstadsvägen 19,<br>871 54 Härnösand,<br>Sweden                                 | <a href="http://www.peckas.com">http://www.peckas.com</a>                                                       |
| Stadsjord                | Sweden      | Slakthusgatan 8,<br>415 02 Göteborg                                               | <a href="https://stadsjord.se">https://stadsjord.se</a>                                                         |
| Agrovet - Strickhof      | Switzerland | Betriebsstandort<br>Lindau Eschikon 27,<br>8315 Lindau                            | <a href="https://www.agrovet-strickhof.ch">https://www.agrovet-strickhof.ch</a>                                 |
| Aquaponic Gardens        | Switzerland | Stickereistrasse 17,<br>8362 Balterswil TG                                        | <a href="http://www.aquaponicgardens.ch">http://www.aquaponicgardens.ch</a>                                     |

|                             |             |                                                                                |                                                                                                                                                 |
|-----------------------------|-------------|--------------------------------------------------------------------------------|-------------------------------------------------------------------------------------------------------------------------------------------------|
| Ecco Jaeger                 | Switzerland | Chriesilöserstrasse<br>65, 7310 Bad Ragaz                                      | <a href="http://www.ecco-jaeger.ch">http://www.ecco-jaeger.ch</a>                                                                               |
| ZHAW- Aquasafe              | Switzerland | Gertrudstrasse 15,<br>8401 Winterthur                                          | <a href="https://www.zhaw.ch">https://www.zhaw.ch</a>                                                                                           |
| Alladale Wilderness Reserve | UK          | Alladale Wilderness<br>Reserve, Ardgay<br>IV24 3BS                             | <a href="https://alladale.com">https://alladale.com</a>                                                                                         |
| Bioaquafarm                 | UK          | The old dairy,<br>Poolbridge<br>rd.Wedmore,<br>Somerset, United<br>Kingdom     | <a href="http://bioaquafarm.co.uk">http://bioaquafarm.co.uk</a>                                                                                 |
| Green lab                   | UK          | Corner of Keeton's<br>Road and Collett<br>Road, Bermondsey,<br>London SE16 4EE | <a href="https://www.greenlab.org">https://www.greenlab.org</a>                                                                                 |
| Greenponics                 | UK          | Ashley road,<br>Bournemouth                                                    | <a href="https://www.facebook.com/pg/greenponics/about/?ref=page_internal">https://www.facebook.com/pg/greenponics/about/?ref=page_internal</a> |
| Greenwich University        | UK          | Old Royal Naval<br>College, Park Row,<br>London SE10 9LS                       | <a href="https://www.gre.ac.uk">https://www.gre.ac.uk</a>                                                                                       |
| Grow Bristol                | UK          | 13-14 Feeder Rd,<br>Bristol BS2 0SB                                            | <a href="https://www.growbristol.co.uk">https://www.growbristol.co.uk</a>                                                                       |
| Grow Up farms               | UK          | Trojan House, 34<br>Arcadia Ave,<br>London, N3 2JU                             | <a href="https://www.growup.org.uk">https://www.growup.org.uk</a>                                                                               |
| Heeley City Farm            | UK          | Richards Road<br>Sheffield                                                     | <a href="https://www.heeleyfarm.org.uk">https://www.heeleyfarm.org.uk</a>                                                                       |
| Smart Greens                | UK          | Fernham Rd,<br>Longcot, Faringdon<br>SN7 7PR, United<br>Kingdom                | <a href="http://www.smart-greens.uk">http://www.smart-greens.uk</a>                                                                             |

|                                                           |    |                                                                                                                                                  |                                                                       |
|-----------------------------------------------------------|----|--------------------------------------------------------------------------------------------------------------------------------------------------|-----------------------------------------------------------------------|
| University of Sheffield, Arthur Willis Environment Center | UK | Department of<br>Animal and Plant<br>Sciences, The<br>University of<br>Sheffield, Alfred<br>Denny Building<br>Western Bank,<br>Sheffield S10 2TN | <a href="https://www.sheffield.ac.uk">https://www.sheffield.ac.uk</a> |
| Urbanag                                                   | UK | Roddy Lane,<br>Kingsley, Fordsham                                                                                                                | <a href="http://www.urbanag.uk">http://www.urbanag.uk</a>             |
